# Supplementary material
Source: PubMed Central journal article supplement (PMC5142297)
Supplement: NIHMS832918-supplement-Supporting_Information.pdf [file NIHMS832918-supplement-Supporting_Information.pdf]

## Supplementary Information

### Surfactant-stripped Frozen Pheophytin Micelles for Multimodal Gut Imaging

Yumiao Zhang, Depeng Wang, Shreya Goel, Boyang Sun, Upendra Chitgupi, Jumin Geng, Haiyan Sun, Todd E. Barnhart, Weibo Cai, Jun Xia and Jonathan F. Lovell \*

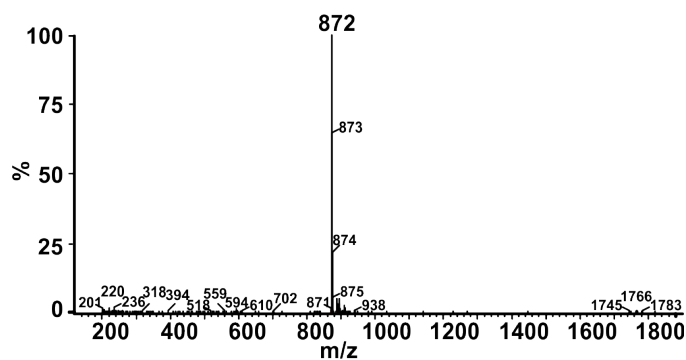

**Supplementary Figure 1:** Mass spectrum of Pheo after acidification showing one single peak (molecular weight of pheophytin-a:  $871.2 \text{ g mol}^{-1}$ )

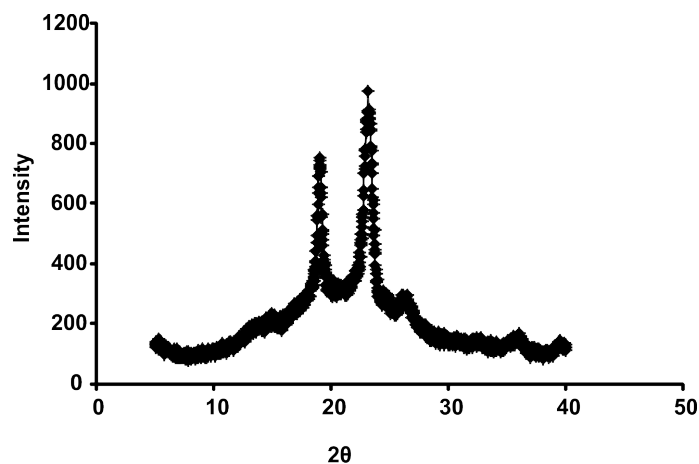

**Supplementary Figure 2:** X-ray powder diffraction spectrum of freeze-dried Pheo ss-InFroMs. The two high peaks observed are from Pluronic F127.

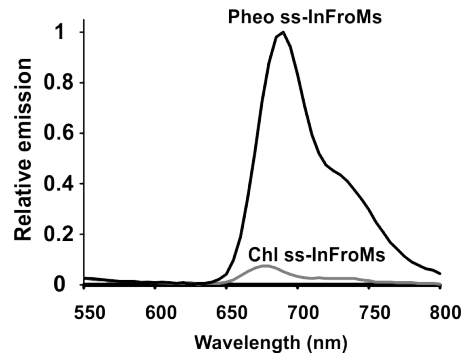

**Supplementary Figure 3:** Normalized fluorescence emission spectra of aqueous Pheo and Chl ss-InFroMs

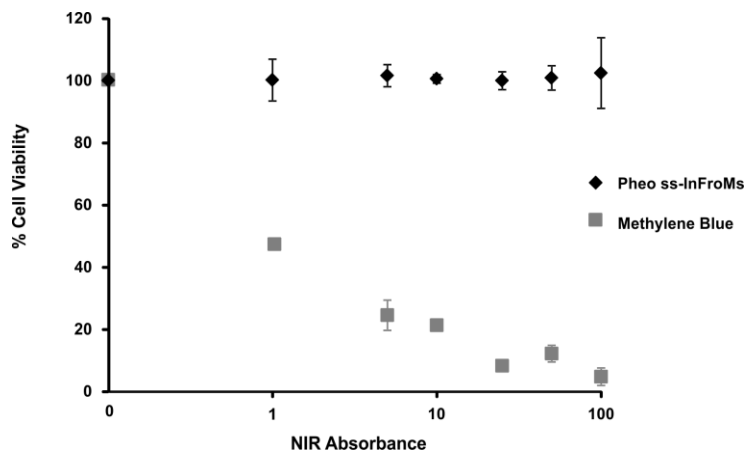

**Supplementary Figure 4:** Caco-2 cellular viability after incubation with pheo ss-InFroMs or methylene blue.

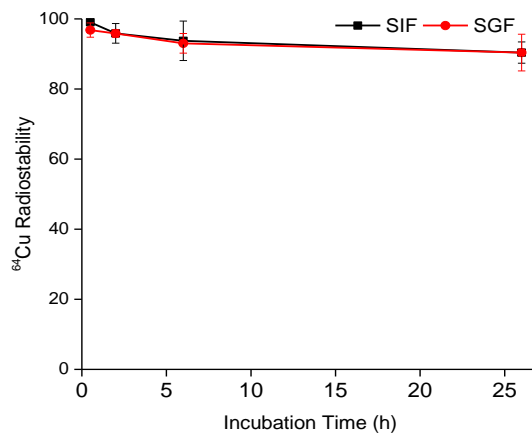

**Supplementary Figure 5:** Stability of  $^{64}\text{Cu}$  chelated ss-InFroMs in simulated gastric fluid and simulated intestinal fluid incubated at 37 °C. (mean $\pm$  std, n=3)

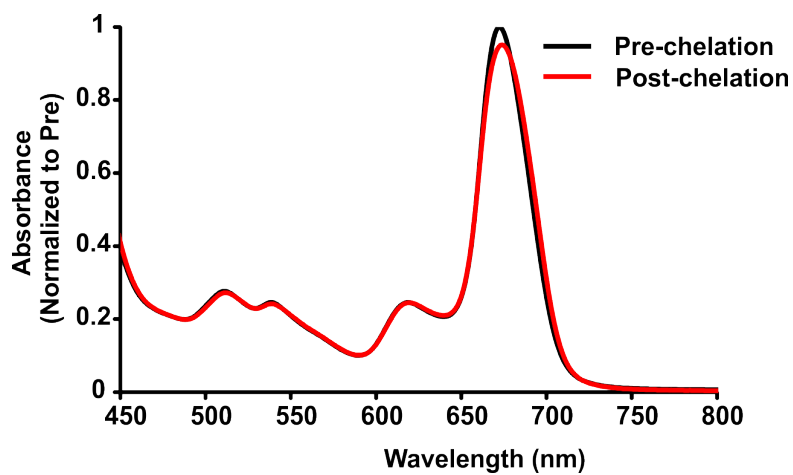

Supplementary Figure 6:  $^{64}\text{Cu}$  labeling did not change absorption of Pheo ss-InFroMs.

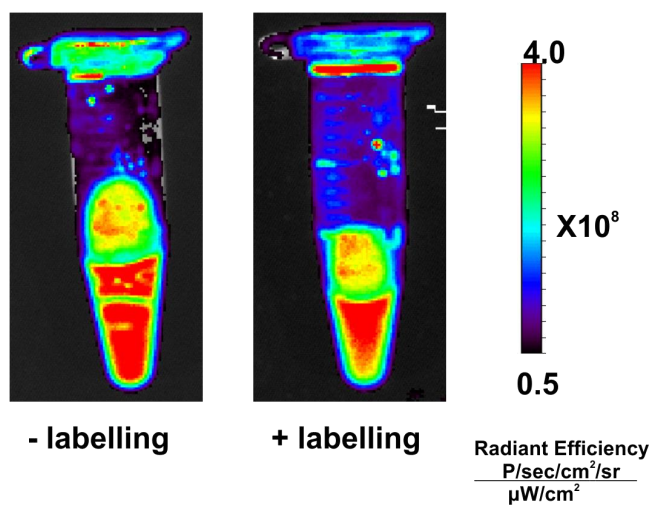

Supplementary Figure 7: After  $^{64}\text{Cu}$  labeling, no significant fluorescence decrease was observed.

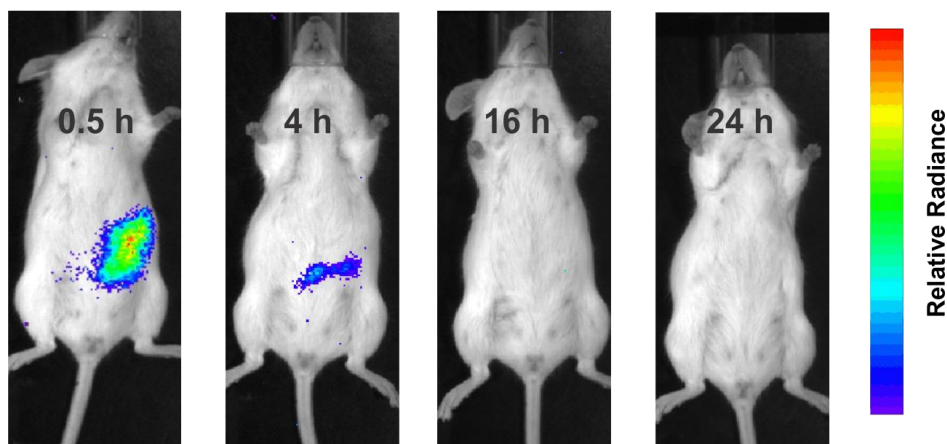

**Supplementary Figure 8:** Representative Cerenkov images of intestine at different time points as indicated. (n=3)

**Supplementary Table 1: Pheo ss-InFroM optical parameters\***

|                                             |                                                                                                             |
|---------------------------------------------|-------------------------------------------------------------------------------------------------------------|
| Peak absorption of Pheo in acetone          | 666 nm                                                                                                      |
| Extinction coefficient of Pheo in acetone   | $52.8 \text{ mM}^{-1} \cdot \text{cm}^{-1}$<br>$60.72 \text{ ml} \cdot \text{mg}^{-1} \cdot \text{cm}^{-1}$ |
| Peak absorption of Pheo Ss-InFroMs          | 662 nm                                                                                                      |
| Extinction coefficient of Pheo in ss-InFroM | $43.6 \text{ mM}^{-1} \cdot \text{cm}^{-1}$<br>$50.13 \text{ ml} \cdot \text{mg}^{-1} \cdot \text{cm}^{-1}$ |
| Pheo to F127 molar ratio                    | 4.97                                                                                                        |
| Pheo to F127 mass ratio                     | 0.344                                                                                                       |
| Pheo ss-InFroM extinction coefficient       | $6.7 \times 10^5 \text{ mM}^{-1} \cdot \text{cm}^{-1}$                                                      |
| Pheo ss-InFroM absorption cross section     | $2.5 \times 10^{-12} \text{ m}^2$                                                                           |

\*Average from n=3 preparations. Parameters calculated based on assumptions described in Zhang et al., Nature Nano, 9, 631–638 (2014)
